# Supplementary material for: Probucol induces the generation of lipid peroxidation products in erythrocytes and plasma of male cynomolgus macaques
Source: PubMed Central journal article supplement (PMC6436040; doi:10.3164/jcbn.18-7), 2018-11-28
Supplement: jcbn18-7sf02.pdf [file jcbn18-7sf02.pdf]

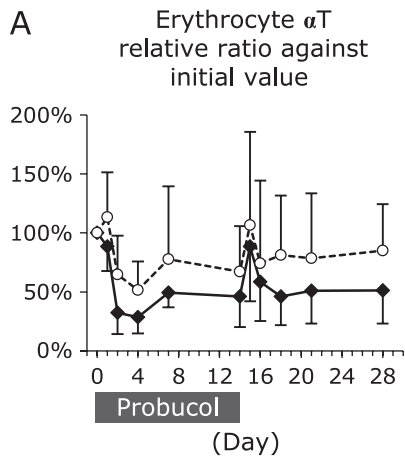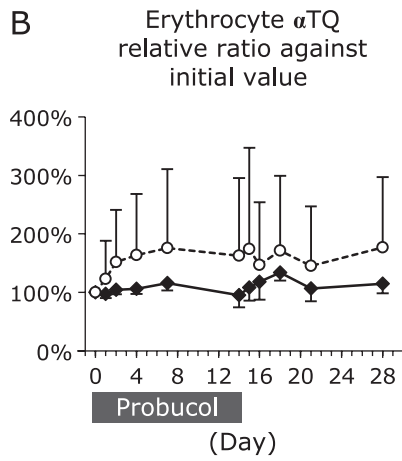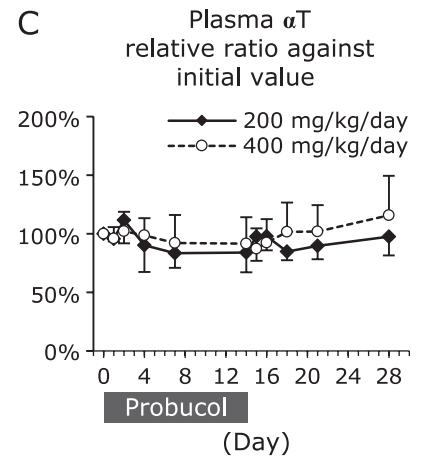

**Supplemental Fig. 2.** The changes from initial value of erythrocyte  $\alpha$ -tocopherol, erythrocyte  $\alpha$ -tocopherylquinone and plasma  $\alpha$ -tocopherol. The average rate of change from the initial value of each monkey was shown; erythrocyte  $\alpha$ T (A) and  $\alpha$ TQ (B) and plasma  $\alpha$ T (C). The data are expressed as mean  $\pm$  SD. Statistical analysis was carried out using ANOVA. <sup>a</sup> $p < 0.05$  compared to the initial (day 0) value of the same individual. Solid diamonds indicate probucol 200 mg/kg/day macaque group. Open circles indicate probucol 400 mg/kg/day administered macaque group.
