# Supplementary material for: Probucol induces the generation of lipid peroxidation products in erythrocytes and plasma of male cynomolgus macaques
Source: PubMed Central journal article supplement (PMC6436040; doi:10.3164/jcbn.18-7), 2018-11-28
Supplement: jcbn18-7st01.pdf [file jcbn18-7st01.pdf]

**Supplemental Table 1.** The results of urinalysis

| Primate       | Day    | Leukocyte |   |    |    |    | Occult blood reaction |   |    |    |    | Urobilinogen |   |    |    |    | Bilirubin |   |    |    |    |
|---------------|--------|-----------|---|----|----|----|-----------------------|---|----|----|----|--------------|---|----|----|----|-----------|---|----|----|----|
|               |        | 0         | 7 | 14 | 21 | 28 | 0                     | 7 | 14 | 21 | 28 | 0            | 7 | 14 | 21 | 28 | 0         | 7 | 14 | 21 | 28 |
| 200 mg/kg/day | No. 1  | -         | - | -  | -  | -  | -                     | - | -  | -  | -  | -            | - | -  | -  | -  | -         | - | -  | -  | -  |
|               | No. 2  | -         | - | -  | -  | -  | -                     | - | -  | -  | -  | -            | - | -  | -  | -  | -         | - | -  | -  | -  |
|               | No. 3  | -         | - | -  | -  | -  | -                     | - | -  | -  | -  | -            | - | -  | -  | 1+ | -         | - | -  | -  | -  |
|               | No. 4  | -         | - | -  | -  | -  | -                     | - | -  | -  | -  | -            | - | -  | 1+ | -  | -         | - | -  | -  | -  |
|               | No. 5  | -         | - | -  | -  | -  | -                     | - | -  | -  | -  | -            | - | -  | -  | -  | -         | - | -  | -  | -  |
| 400 mg/kg/day | No. 6  | 1+        | - | -  | -  | -  | -                     | - | -  | -  | -  | -            | - | -  | -  | -  | -         | - | -  | -  | -  |
|               | No. 7  | -         | - | -  | -  | -  | -                     | - | -  | -  | -  | -            | - | -  | -  | -  | -         | - | -  | -  | -  |
|               | No. 8  | -         | - | -  | -  | -  | -                     | - | -  | -  | -  | -            | - | -  | -  | -  | -         | - | -  | -  | -  |
|               | No. 9  | -         | - | -  | -  | -  | -                     | - | -  | -  | -  | -            | - | -  | -  | -  | -         | - | -  | -  | -  |
|               | No. 10 | -         | - | -  | -  | -  | -                     | - | -  | -  | -  | -            | - | -  | -  | -  | -         | - | -  | -  | -  |

  

| Primate       | Day    | Ketonic metabolite |   |    |    |    | Glucose |   |    |    |    | Protein |   |    |    |    | pH value |   |    |    |    |
|---------------|--------|--------------------|---|----|----|----|---------|---|----|----|----|---------|---|----|----|----|----------|---|----|----|----|
|               |        | 0                  | 7 | 14 | 21 | 28 | 0       | 7 | 14 | 21 | 28 | 0       | 7 | 14 | 21 | 28 | 0        | 7 | 14 | 21 | 28 |
| 200 mg/kg/day | No. 1  | -                  | - | -  | -  | -  | -       | - | -  | -  | -  | -       | - | -  | -  | -  | 6        | 6 | 7  | 6  | 8  |
|               | No. 2  | -                  | - | -  | 1+ | -  | -       | - | -  | -  | -  | -       | - | -  | -  | -  | 8        | 8 | 6  | 8  | 9  |
|               | No. 3  | -                  | - | -  | -  | -  | -       | - | -  | -  | -  | 1+      | - | ±  | ±  | -  | 9        | 8 | 8  | 9  | 8  |
|               | No. 4  | 1+                 | - | -  | -  | -  | ±       | - | -  | -  | -  | ±       | - | -  | -  | -  | 7        | 7 | 6  | 7  | 6  |
|               | No. 5  | -                  | - | -  | -  | -  | -       | - | -  | -  | -  | -       | - | -  | -  | -  | 9        | 9 | 7  | 8  | 9  |
| 400 mg/kg/day | No. 6  | -                  | - | -  | -  | -  | -       | - | -  | -  | -  | ±       | - | ±  | -  | ±  | 6        | 9 | 8  | 8  | 7  |
|               | No. 7  | -                  | - | -  | -  | -  | -       | - | -  | -  | -  | -       | - | -  | -  | -  | 9        | 9 | 8  | 6  | 8  |
|               | No. 8  | -                  | - | -  | -  | -  | -       | - | -  | -  | -  | -       | ± | ±  | -  | -  | 6        | 9 | 9  | 6  | 6  |
|               | No. 9  | -                  | - | -  | -  | -  | -       | - | -  | -  | -  | -       | - | -  | -  | -  | 9        | 7 | 7  | 7  | 8  |
|               | No. 10 | -                  | - | -  | -  | -  | -       | - | -  | -  | -  | -       | - | -  | -  | -  | 9        | 6 | 7  | 8  | 8  |
